# Supplementary material for: Assessment of a Teaching Module for Cardiac Auscultation of Horses by Veterinary Students
Source: MDPI journal article supplement (doi:10.3390/ani14091341), 2024-04-29
Supplement: s1 [file s1]

## Thematic analysis – Coding and Q's

### Pre-intervention Analysis

| Definitions of Coding Nodes – ‘What practical skills are you most interested in learning/teaching more about regarding auscultation?’ |       |                                                              |
|---------------------------------------------------------------------------------------------------------------------------------------|-------|--------------------------------------------------------------|
| TITLE                                                                                                                                 | CODE  | ATTRIBUTES                                                   |
| Competency                                                                                                                            | COMP  | Any reference to competency in auscultating the heart        |
| Abnormal versus normal                                                                                                                | A&N   | Any reference to distinguishing between normal and abnormal  |
| Practical skills                                                                                                                      | SKILL | Any reference to developing practical skills and/or training |
| Anatomy & Physiology                                                                                                                  | A&P   | Any reference to anatomy and physiology                      |
| Heart murmurs & arrhythmias                                                                                                           | M&A   | Any reference to heart murmurs and arrhythmias               |
| Lung or GIT                                                                                                                           | L/G   | Any reference to clear explanations and descriptions         |
| Other                                                                                                                                 | OTH   | Anything that doesn't fit any of the above!                  |

| Definitions of Coding Nodes – ‘How would you describe your competency level with auscultation of the heart, lung and GIT?’ |      |                                                                          |
|----------------------------------------------------------------------------------------------------------------------------|------|--------------------------------------------------------------------------|
| TITLE                                                                                                                      | CODE | ATTRIBUTES                                                               |
| Good                                                                                                                       | G    | Anything relating to a good level of competency when auscultating        |
| Average                                                                                                                    | A    | Anything relating to a moderate/average level of competency auscultating |
| Poor                                                                                                                       | P    | Anything relating to a poor level of competency auscultating             |

| Definitions of Coding Nodes – ‘What do you find most difficult about developing auscultation skills?’ |      |                                                                                                           |
|-------------------------------------------------------------------------------------------------------|------|-----------------------------------------------------------------------------------------------------------|
| TITLE                                                                                                 | CODE | ATTRIBUTES                                                                                                |
| Practical skills                                                                                      | PRAC | Any reference to the lack of opportunity to gain practical skills in auscultation                         |
| Abnormal versus normal                                                                                | A&N  | Any reference to difficulty in distinguishing between abnormal pathologies and normal to make a diagnosis |
| Anatomy and physiology                                                                                | A&P  | Any reference to understanding anatomy, physiology and placement of stethoscope for auscultation          |
| Heart murmur                                                                                          | MUR  | Any reference to heart murmurs specifically subtle/low grade heart murmurs                                |
| Teaching and learning                                                                                 | TEA  | Any reference to having supervision when auscultating, teachers or learning resources                     |
| GIT auscultation                                                                                      | GIT  | Any reference to ease of use                                                                              |
| Other                                                                                                 | OTH  | Anything that doesn't fit any of the above!                                                               |

| 5th Year Survey: Pre-Cardiology Learning Resource |                                                                                                       |                                                                                            |                                                                       |
|---------------------------------------------------|-------------------------------------------------------------------------------------------------------|--------------------------------------------------------------------------------------------|-----------------------------------------------------------------------|
| 2021                                              |                                                                                                       |                                                                                            |                                                                       |
| ID                                                | What practical skills are you most interested in learning/teaching more about regarding auscultation? | How would you describe your competency level with auscultation of the heart, lung and GIT? | What do you find most difficult about developing auscultation skills? |

|                |                                                                                                                                                                                                                                          |                                                                                                                                           |                                                                                                                                                                                                  |
|----------------|------------------------------------------------------------------------------------------------------------------------------------------------------------------------------------------------------------------------------------------|-------------------------------------------------------------------------------------------------------------------------------------------|--------------------------------------------------------------------------------------------------------------------------------------------------------------------------------------------------|
| 1<br>(discard) | Diagnosing murmurs                                                                                                                                                                                                                       | Good                                                                                                                                      | Diagnosing low grade murmurs                                                                                                                                                                     |
| 2<br>(discard) | Knowing normal                                                                                                                                                                                                                           | Fair to Good                                                                                                                              | Hearing normal, hearing in field                                                                                                                                                                 |
| 3<br>(discard) | Competent auscultation of heart                                                                                                                                                                                                          | Average                                                                                                                                   | Describing what I hear. Deducing what is abnormal.                                                                                                                                               |
| 4<br>(discard) | Everything. Initially what is normal and then how to distinguish different parts of the heart working (and other organs) and then learn to identify common abnormalities. I am in second year so we have not done very much of this yet. | Not competent yet                                                                                                                         | Starting- just got stethoscope today, would be good to know what is common in humans and animals in terms of sounds so we can practice on ourselves firstXD                                      |
| 5              | What different conditions sound like on auscultation                                                                                                                                                                                     | Basic                                                                                                                                     | Describing the patterns I hear upon auscultation                                                                                                                                                 |
| 6              | Normal and abnormal lung sounds                                                                                                                                                                                                          | Very poor                                                                                                                                 | Difficult to practice at home                                                                                                                                                                    |
| 7              | How to identify what type of murmur                                                                                                                                                                                                      | Competent with Identifying normal and abnormal but not identifying exact types of murmurs                                                 | Exposure                                                                                                                                                                                         |
| 8              | Identifying murmurs and arrhythmias                                                                                                                                                                                                      | Moderate level; able but not confident                                                                                                    | Having enough resources to consistently compare normal to abnormal.                                                                                                                              |
| 9              | Identifying murmurs                                                                                                                                                                                                                      | Poor                                                                                                                                      | Understanding what the different components of a heart beat mean (i.e. systolic, diastolic) and what murmurs mean (i.e. crescendo, decrescendo) and I also do not understand how to read and ECG |
| 10             | Experience hearing different murmurs                                                                                                                                                                                                     | Average                                                                                                                                   | Not many opportunities to hear abnormalities                                                                                                                                                     |
| 11             | Identify murmur                                                                                                                                                                                                                          | Poor                                                                                                                                      | Lack of experience                                                                                                                                                                               |
| 12             | Heart and GIT auscultation                                                                                                                                                                                                               | Average                                                                                                                                   | Knowing what normal GIT sounds are and identifying heart murmurs                                                                                                                                 |
| 13             | Hands on experience with diagnosed cases of cardiac murmurs and arrhythmias.                                                                                                                                                             | It is okay, would like to hear more real life cases of abnormal lung and heart sounds. Would not be able to identify increased GIT sounds | Hearing low grade heart murmurs, developing confidence to confidently identify mildly abnormal changes                                                                                           |
| 14             | Just a basic understanding of how to do it with good technique and the most common findings.                                                                                                                                             | Very poor                                                                                                                                 | Placement of the stethoscope and understanding what you are trying to hear                                                                                                                       |

|    |                                                                                                                                                                                                                                                           |                                                                                                                                                                                                                   |                                                                                                                                                                                            |
|----|-----------------------------------------------------------------------------------------------------------------------------------------------------------------------------------------------------------------------------------------------------------|-------------------------------------------------------------------------------------------------------------------------------------------------------------------------------------------------------------------|--------------------------------------------------------------------------------------------------------------------------------------------------------------------------------------------|
|    | Especially want to know 'normal'                                                                                                                                                                                                                          |                                                                                                                                                                                                                   |                                                                                                                                                                                            |
| 15 | I need more training that focuses on the practical application. I struggle to understand a lot of the cardiac training when it is just in lecture form (and we did not have any pracs on clinical exam of the horse or cardiac auscultation due to COVID) | I know roughly where to place the stethoscope, but I have trouble identifying problems                                                                                                                            | The lack of practical training in this area is extremely lacking in this program.                                                                                                          |
| 16 | Learning to differentiate the different heart sounds                                                                                                                                                                                                      | Non-existent                                                                                                                                                                                                      | Lack of ability to practice on actual animals                                                                                                                                              |
| 17 | Real world practice classifying and grading murmurs                                                                                                                                                                                                       | Satisfactory. I can hear a grade 3+ murmur, can usually describe it as systolic or diastolic. Can identify harsh bronchovesicular, harsh crackles and wheezes. Can identify presence and intensity of GIT sounds. | Lack of hands on experience, we learn so much theory but I had probably heard 8 murmurs before 5th year. I have definitely improved during my clinical time.                               |
| 18 | Identifying heart conditions                                                                                                                                                                                                                              | Not adequate                                                                                                                                                                                                      | Not getting familiar enough with the abnormal                                                                                                                                              |
| 19 | Lung sounds - I find it really difficult                                                                                                                                                                                                                  | Proficient but not great                                                                                                                                                                                          | Lack of practice in the field. I find it very different auscultating real patients because they are all different and there are lots of background noises, in comparison to online library |
| 20 | Abnormal heart and lung sounds                                                                                                                                                                                                                            | Moderate for GIT and heart; poor for lung                                                                                                                                                                         | Lack of resources or ability to auscultate an abnormal sounds and have a person with expertise confirm whether or not I was correct in my assessment.                                      |
| 21 | Classifying murmurs                                                                                                                                                                                                                                       | Sound, but have not been exposed to certain types of pathology. Audio-learning would give me more exposure so that I can recognize the abnormality later.                                                         | Recognizing abnormalities that you have never heard before.                                                                                                                                |
| 22 | Picking valves and systole/diastole                                                                                                                                                                                                                       | Improving, confident to pick up obvious murmurs                                                                                                                                                                   | Gaining the experience/case load to listen to                                                                                                                                              |
| 23 | How to identify normal and abnormal heart sounds and the topographical anatomy to find such sounds/heart valves                                                                                                                                           | No very competent                                                                                                                                                                                                 | Finding the anatomical locations to hear heart sounds                                                                                                                                      |

|    |                                                                                             |                                                                                                                                                   |                                                                                                                                                           |
|----|---------------------------------------------------------------------------------------------|---------------------------------------------------------------------------------------------------------------------------------------------------|-----------------------------------------------------------------------------------------------------------------------------------------------------------|
| 24 | Identifying murmurs                                                                         | Beginner-intermediate                                                                                                                             | Getting enough practice                                                                                                                                   |
| 25 | How to recognise abnormalities efficiently                                                  | Needs improvement                                                                                                                                 | The opportunity to actually practice on an animal                                                                                                         |
| 26 | Cardiac and GI auscultation                                                                 | Low level competency                                                                                                                              | Gaining practical experience                                                                                                                              |
| 27 | Exposure to real life murmurs / regurgitates that aren't so obvious coz that's realistic    | Not bad but we weren't able to do clinical exams in third year due to covid so technically never was taught how to do this on the horse           | Sometimes struggle to find the actual heart but once I do I'm good                                                                                        |
| 28 | Just practicing it more so i can identify abnormalities better and be confident in doing it | Low competency. Good in theory but haven't actually done practicals to be competent                                                               | I guess more the availability of horses to practice                                                                                                       |
| 29 | Listening to the actual horses with cardio abnormality                                      | Normal                                                                                                                                            | Differentiating the different murmurs                                                                                                                     |
| 30 | I want to learn the basics for day 1 competencies                                           | Incompetent. I have never auscultated on a horse before. I may be able to identify some stuff by matching it to previous recordings I have heard. | Where to put the stethoscope to get all the desired valves. I always have difficulty finding stuff, so I think I will have difficulty finding the valves. |
| 31 | Where to auscultate                                                                         | Not competent                                                                                                                                     | Lack of practice                                                                                                                                          |
| 32 | Being able to differentiate normal vs abnormal heart/lung/gut sounds                        | Not very competent                                                                                                                                | Not hearing enough normal sounds to be able to differentiate from abnormal sounds                                                                         |
| 33 | Detecting murmurs and arrhythmias                                                           | Average                                                                                                                                           | Hearing the subtle heart sounds of a murmur                                                                                                               |
| 34 | .                                                                                           | At this point in learning, my competency is quite low                                                                                             | When you are in a prac it is hard to know you are hearing exactly what the tutor is hearing                                                               |
| 35 | Performing more precise cardiac auscultation                                                | not very good                                                                                                                                     | Not having enough practical hours to develop skills                                                                                                       |
| 36 | Auscultation                                                                                | Very low                                                                                                                                          | Putting lectures into real life                                                                                                                           |
| 37 | Being more adept at picking up abnormal sounds and their timings                            | Low                                                                                                                                               | Lack of auditory practice combined with physical placement of stethoscope on an actual horse                                                              |
| 38 | The different heart problem sounds                                                          | Under confident                                                                                                                                   | Having limited chances to practice                                                                                                                        |
| 39 | Correct sounds                                                                              | Not competent                                                                                                                                     | Not knowing what to be listening for                                                                                                                      |
| 40 | Familiarising myself with common abnormalities                                              | Missed a lot of 3rd year thanks to covid.... So realistically it could use some work                                                              | Some individuals are harder to hear than others and when you're learning it can be off-putting/difficult to tell if you're placing your                   |

|    |                                                                                                                                                                         |                                                                                                                                                                                                                                       |                                                                                                                                                                                                          |
|----|-------------------------------------------------------------------------------------------------------------------------------------------------------------------------|---------------------------------------------------------------------------------------------------------------------------------------------------------------------------------------------------------------------------------------|----------------------------------------------------------------------------------------------------------------------------------------------------------------------------------------------------------|
|    |                                                                                                                                                                         |                                                                                                                                                                                                                                       | stethoscope in the right place or if you need to push down harder etc.                                                                                                                                   |
| 41 | Diagnosing abnormal heart sounds                                                                                                                                        | Poor, experience only in first year                                                                                                                                                                                                   | Learning the right spots to auscultate                                                                                                                                                                   |
| 42 | Identifying pathology in specific valves                                                                                                                                | I can find the correct locations and listen but not sure of exact pathology sounds                                                                                                                                                    | Getting experience listening to different species with different pathologies                                                                                                                             |
| 43 | Proper placement of the stethoscope                                                                                                                                     | Poor                                                                                                                                                                                                                                  | Having the opportunity to practice                                                                                                                                                                       |
| 44 | Heart sounds                                                                                                                                                            | Poor                                                                                                                                                                                                                                  | Lack of opportunities to practice                                                                                                                                                                        |
| 45 | More understanding of normal heart sounds                                                                                                                               | Very low                                                                                                                                                                                                                              | Not enough practical time                                                                                                                                                                                |
| 46 | Identifying murmurs and other heart issues                                                                                                                              | Very low                                                                                                                                                                                                                              | We don't have enough practicals to practice doing them                                                                                                                                                   |
| 47 | Anatomical landmarks                                                                                                                                                    | poor                                                                                                                                                                                                                                  | Anatomical landmarks and lack of access to live animals                                                                                                                                                  |
| 48 | Where to place stethoscope in each animal. What does normal sound like. What should I when I can't hear something when I should be able to with the stethoscope I have? | Low - I have attempted to practise this on my cats (only practice animals available to me), but it's more of a 'stab in the dark' approach rather than useful building of skills                                                      | We did not do any PE practicals on anything but cattle. I feel like I struggle to find the proper landmarks or perhaps do not have the proper technique for my auscultation to be of diagnostic quality. |
| 49 | Mainly normal vs abnormal sounds                                                                                                                                        | Extremely limited                                                                                                                                                                                                                     | Knowing the normal ranges initially                                                                                                                                                                      |
| 50 | Heart sounds, specific locations to identify specific pathologies and getting familiar with the different sounds of different pathologies                               | I feel confident in auscultating normal in the heart, lungs and GIT and so may be able to identify abnormal but not specific diagnosis, especially heart sounds. Lung abnormalities are easier to classify as crackles, wheezes, etc. | You don't really get to hear an abnormality until it is presented to you, so I only know what normal sounds like so I may be able to identify abnormal but not specific diagnosis.                       |
| 51 | Positioning of the stethoscope for each valve                                                                                                                           | Capable in identifying normal and can identify when things are abnormal but poorly specific for any particular cardiac disease                                                                                                        | Translating a description of a pathology into listening and diagnosing said pathology                                                                                                                    |
| 52 | The differences in murmurs                                                                                                                                              | Poor                                                                                                                                                                                                                                  | Noticing the very subtle murmurs                                                                                                                                                                         |
| 53 | How to determine what type of murmur there is, some can be so subtle I have no idea how tell if                                                                         | Very low - especially in horses                                                                                                                                                                                                       | Hearing if there is something wrong because it can be so subtle and then determining the location                                                                                                        |

|      |                                                                                                                                                                                 |                                                                                                                                                                                                                                 |                                                                                                                                                                                                                                                       |
|------|---------------------------------------------------------------------------------------------------------------------------------------------------------------------------------|---------------------------------------------------------------------------------------------------------------------------------------------------------------------------------------------------------------------------------|-------------------------------------------------------------------------------------------------------------------------------------------------------------------------------------------------------------------------------------------------------|
|      | there is one and what sort it is                                                                                                                                                |                                                                                                                                                                                                                                 |                                                                                                                                                                                                                                                       |
| 54   | Where to actually listen                                                                                                                                                        | In horses, limited (in smallies and cattle competent)                                                                                                                                                                           | Lack of practice on real horses                                                                                                                                                                                                                       |
| 55   | Identifying abnormal sound                                                                                                                                                      | Basic                                                                                                                                                                                                                           | Practical time to practice                                                                                                                                                                                                                            |
| 56   | Finding correct positioning of stethoscope, and differentiating the different types of murmurs (still get mixed up between them)                                                | Not very competent at all. I am confident I can identify 'normal' in most cases, but then again, I still lack in a lot of experience.                                                                                           | Unless I can hear something, and be told/figure out - what I'm hearing is 'this', then it's tricky to develop an ear for it. I think the more practice I can get, the better (especially with a teacher to help avoid confusion/incorrect reasoning). |
| 2022 |                                                                                                                                                                                 |                                                                                                                                                                                                                                 |                                                                                                                                                                                                                                                       |
| 57   | Identifying any cardiac conditions                                                                                                                                              | Very poor                                                                                                                                                                                                                       | Hearing a pattern and actually remembering what condition it identifies to                                                                                                                                                                            |
| 58   | Murmurs                                                                                                                                                                         | poor                                                                                                                                                                                                                            | Connecting the sound to the condition and its pathogenicity                                                                                                                                                                                           |
| 59   | Getting exposed to more normal cases so I can identify when something is abnormal and then go from there.                                                                       | My skills are pretty basic, I can auscultate normal reasonably comfortably, I think I would be able to identify abnormal sounds and describe them with basic terms but wouldn't be able to identify specific abnormalities yet. | Getting enough exposure to normal and abnormal cases to actually hear the difference.                                                                                                                                                                 |
| 60   | Segregating systole and diastole                                                                                                                                                | Okay at identifying normal, not so good at abnormal                                                                                                                                                                             | Murmurs                                                                                                                                                                                                                                               |
| 61   | All the pathology regarding cardiac                                                                                                                                             | Probably 0/10 at the moment, I can only pick up sounds and that is all for me for now.                                                                                                                                          | I even have the difficulty to put the stethoscope at the right location to pick up the normal sound....Sometimes i can get very loud heart beat while sometimes i do not pick up a single sound.                                                      |
| 62   | Where to find each valve on the horse. I can find the mitral valve easily the others not so well. Also, the ability to recognise the most common abnormalities on auscultation. | Just enough to be considered competent                                                                                                                                                                                          | Where to place the stethoscope-cardiac                                                                                                                                                                                                                |
| 63   | Arrhythmia/murmur identification                                                                                                                                                | Moderate - I can identify when something is                                                                                                                                                                                     | Describing abnormalities.                                                                                                                                                                                                                             |

|              |                                                                                                                                                                |                                                                                                                                                                          |                                                                                                                                                                     |
|--------------|----------------------------------------------------------------------------------------------------------------------------------------------------------------|--------------------------------------------------------------------------------------------------------------------------------------------------------------------------|---------------------------------------------------------------------------------------------------------------------------------------------------------------------|
|              |                                                                                                                                                                | abnormal, but often not the specific abnormality.                                                                                                                        |                                                                                                                                                                     |
| 64           | Identifying valves                                                                                                                                             | Neutral                                                                                                                                                                  | Don't know what the normal/abnormal sounds supposed to sound like                                                                                                   |
| 65           | How to localise murmurs and grade them                                                                                                                         | I can identify normal heart sounds and abnormal, but not diagnose specific murmurs. Happy with identifying normal bronchovesicular lung sounds and GIT sounds in horses. | Most of the animals we encounter during our time in vet school are clinically "healthy", so it's hard to practice listening to abnormal heart, lung and GIT sounds. |
| 66           | Grading murmur                                                                                                                                                 | Low                                                                                                                                                                      | Capturing subtle differences                                                                                                                                        |
| 67 (discard) | Identifying murmurs                                                                                                                                            | Basic                                                                                                                                                                    | Time to practice on different horses                                                                                                                                |
| 68           | GIT and lameness tutorials similar to this would be great                                                                                                      | It was oK RE lungs and GIT, and OK with the heart, definitely better after Alyses tutorial tho                                                                           | It can be so subtle - and sound so different over the different valves                                                                                              |
| 69           | How to identify murmurs and arrhythmias                                                                                                                        | Able to identify abnormalities but unable to classify them                                                                                                               | Lack of opportunity to practice                                                                                                                                     |
| 70           | Auscultating different murmurs                                                                                                                                 | Poor                                                                                                                                                                     | Having an reference for what is normal                                                                                                                              |
| 71           | Identifying murmurs                                                                                                                                            | Poor                                                                                                                                                                     | Not having someone confirm whether what I hear is correct                                                                                                           |
| 72           | Learning about the different murmurs                                                                                                                           | I can usually pick up most things, but do not feel confident enough to diagnose Something without having someone else double check                                       | Getting enough practice with being able to double check with someone with more experience                                                                           |
| 73           | Being able to differentiate different heart murmurs                                                                                                            | Poor                                                                                                                                                                     | Being able to know what is normal vs abnormal                                                                                                                       |
| 74           | ID different sounds                                                                                                                                            | Not good                                                                                                                                                                 | Chance to really have a real animal to practice on                                                                                                                  |
| 75           | Ability to identify murmurs and type of murmurs                                                                                                                | Moderate                                                                                                                                                                 | Identifying low grade heart murmurs                                                                                                                                 |
| 76           | Lung and heart sounds                                                                                                                                          | Very poor                                                                                                                                                                | Difficult to teach and difficult to learn                                                                                                                           |
| 77           | Just further opportunities to listen and practice. I had the equine medical prac yesterday and we listened to only four horses and I found it very challenging | Poor-moderate - I just dont have enough experience                                                                                                                       | Discerning what is a murmur and what is normal or gut sounds                                                                                                        |
| 78           | Identifying murmur/abnormalities                                                                                                                               | Can identify the murmur but can't specify the type                                                                                                                       | Not having enough experience (only theory based)                                                                                                                    |
| 79           | What the characteristic sounds are of typical                                                                                                                  | I feel more competent calling lung and gut                                                                                                                               | I struggle to differentiate the different valves and to                                                                                                             |

|    |                                                                                                         |                                                                                                                                                                                                                 |                                                                                                        |
|----|---------------------------------------------------------------------------------------------------------|-----------------------------------------------------------------------------------------------------------------------------------------------------------------------------------------------------------------|--------------------------------------------------------------------------------------------------------|
|    | cardiac abnormalities so I feel more confident in recognising them.                                     | sounds normal than I do cardiac sounds as I believe there is much more variation with these sounds.                                                                                                             | note what rhythms are abnormal.                                                                        |
| 80 | Using echocardiogram to identify AV blocks etc preferably in practical classes instead of just lectures | not very competent, only what we have learnt in 3rd year                                                                                                                                                        | Finding the right place to listen every time, especially when animals have individual differences      |
| 81 | Being able to identify the type of murmur                                                               | i know what normal is but struggle with abnormal                                                                                                                                                                | Not having enough practice of abnormal                                                                 |
| 82 | Learning to identify what is abnormal confidently                                                       | Very little practice with auscultation                                                                                                                                                                          | Knowing what is normal and variations of normal                                                        |
| 83 | The ability to recognise and diagnose abnormalities                                                     | poor. have not been exposed enough to be confident in applying theoretical knowledge.                                                                                                                           | Access to animals with pathology, or high quality audio/visual aids that are realistic and engaging.   |
| 84 | Listening to non-pathologic vs pathologic sounds                                                        | low-moderate competency                                                                                                                                                                                         | Needing lots of exposure to know what you're hearing                                                   |
| 85 | Recognising different murmur types and when they occur in the cardiac cycle                             | Low, only able to detect obvious changes                                                                                                                                                                        | Not having enough hands on practice auscultating animals                                               |
| 86 | How to tell in lung sounds are increased or decreased                                                   | preliminary                                                                                                                                                                                                     | Knowing when something is normal                                                                       |
| 87 | Everything                                                                                              | ok                                                                                                                                                                                                              | Not enough opportunities to practice as a student                                                      |
| 88 | Where to place the stethoscope with precision for each valve                                            | Average                                                                                                                                                                                                         | Getting a good sound and knowing which abnormality I am hearing                                        |
| 89 | Learning murmurs                                                                                        | ...                                                                                                                                                                                                             | Available practical time                                                                               |
| 90 | How to locate the different heart valves through auscultation                                           | Average. I can identify heart, lung and GIT sounds, and I am able to identify if the horse has a murmur or an arrhythmia. But I am not able to distinguish what type of murmur or arrhythmia that I am hearing. | Identifying the differences in the different murmurs.                                                  |
| 91 | Hearing the different types of murmurs and defects                                                      | Not sufficient to identify all abnormalities                                                                                                                                                                    | Having access to animals with murmurs and having confirmation of the type of murmur these animals have |
| 92 | Audible resources                                                                                       | Average, needs improvement                                                                                                                                                                                      | Lack of audible resources                                                                              |
| 93 | Being confident in my auscultation skills                                                               | Not that confidence. I second guess myself if theres a murmur or not.                                                                                                                                           | Knowing if I'm hearing what I'm meant to be hearing.                                                   |
| 94 | Identifying pathologies                                                                                 | Adequate but needs more practice                                                                                                                                                                                | Exposure to opportunities to perform auscultation                                                      |



### Post-intervention Analysis

| Definitions of Coding Nodes – ‘What was most helpful about the learning resource?’ |      |                                                                                                                       |
|------------------------------------------------------------------------------------|------|-----------------------------------------------------------------------------------------------------------------------|
| TITLE                                                                              | CODE | ATTRIBUTES                                                                                                            |
| Complete resource                                                                  | RES  | Any reference to the helpfulness of having the material condensed into a single resource                              |
| Audio visual                                                                       | AV   | Any reference to the audio or visuals being helpful or the inclusion of audio recordings and/or ECG’s in the resource |
| Abnormal                                                                           | ABN  | Any reference to including information regarding abnormalities or pathologies                                         |
| Nothing                                                                            | NOT  | Any reference to the resource not being helpful                                                                       |
| Revision                                                                           | REV  | Any reference to anatomy and/or revision                                                                              |
| Heart murmur                                                                       | MUR  | Any reference to heart murmurs specifically                                                                           |
| Clear explanation                                                                  | CLE  | Any reference to clear explanations and descriptions                                                                  |
| Ease of use                                                                        | EASE | Any reference to ease of use                                                                                          |
| Understanding                                                                      | UN   | Any reference to understanding information presented in the resource                                                  |
| Other                                                                              | OTH  | Anything that doesn’t fit any of the above!                                                                           |

| Definitions of Coding Nodes – ‘What would improve the learning resource?’ |      |                                                                                    |
|---------------------------------------------------------------------------|------|------------------------------------------------------------------------------------|
| TITLE                                                                     | CODE | ATTRIBUTES                                                                         |
| Clearer explanations                                                      | CLA  | Any reference to the explanations and clarity of information in the resource       |
| Audio                                                                     | AUD  | Any reference to the clearness of audio recordings or inclusion of more recordings |
| Concise                                                                   | CON  | Any reference to improving the conciseness of the slides                           |
| Nothing                                                                   | NOT  | Any reference to the resource not needing any improvements                         |
| Cases                                                                     | CAS  | Reference to more cases and/or inclusion of more quiz questions.                   |
| More interaction                                                          | INT  | Technology and improved graphics to make it even more interactive                  |
| Accessibility                                                             | ACC  | More accessibility and/or incorporation in more areas it can be available          |
| Additional information                                                    | INFO | Any reference to include additional information to include                         |
| Other                                                                     | OTH  | Anything that doesn’t fit any of the above!                                        |

### 5<sup>th</sup> Year Survey 2021 & 2022: Post Cardiology Learning Resource

| Respondent ID | What was most helpful about the learning resource                                                                                                                                                                   | What would improve the learning resource?                                                                                                                                                                                                                                                                                   |
|---------------|---------------------------------------------------------------------------------------------------------------------------------------------------------------------------------------------------------------------|-----------------------------------------------------------------------------------------------------------------------------------------------------------------------------------------------------------------------------------------------------------------------------------------------------------------------------|
| <b>2021</b>   |                                                                                                                                                                                                                     |                                                                                                                                                                                                                                                                                                                             |
| 1             | It was good to have all the material condensed into 1 resource                                                                                                                                                      | I still can't tell the difference for auscultation for a fib and 2nd degree av block. I think some slide titles need to be clarified - for example "mitral regurgitation - aortic valve" was at first confusing                                                                                                             |
| 2             | Audio and visuals                                                                                                                                                                                                   | Maybe not so many words on a slide                                                                                                                                                                                                                                                                                          |
| 3             | Having audio files and all the information together in one place. It was very clearly structured and written                                                                                                        | Less youtube links, occasionally there's too many words on the slide - lose interest after a while. May be better if quiz answers came after each question so it's easier to go back and revise?                                                                                                                            |
| 4             | Nothing                                                                                                                                                                                                             | Nothing                                                                                                                                                                                                                                                                                                                     |
| 5             | Examples of each type of abnormality                                                                                                                                                                                | Slightly clearer sound examples                                                                                                                                                                                                                                                                                             |
| 6             | Heart sounds                                                                                                                                                                                                        | More cases to practice                                                                                                                                                                                                                                                                                                      |
| 7             | Sounds are quite clear and clearly states what heart murmur the sound is corresponding to                                                                                                                           | Nothing. I think this resource with adequate experience in auscultation in actual horses will help with this                                                                                                                                                                                                                |
| 8             | Being able to hear the heart sounds with slides that explain what is happen and show the ECG along with it. It was also nice to not have lecturers talking over the top of the sound so I can actually listen to it | It would be awesome if there was some way to have a little ball move along the ECG in time with the sound so we can link the sound with the visual (kinda like a little karaoke ball). In the quiz section you asked if the sound was normal or abnormal and then answered with a yes and no instead of normal and abnormal |
| 9             | I did like the links to YouTube videos - visual animation is the best way to understand and remember physiology I feel                                                                                              | The audio was not great, but realistic of what you will hear out in the field so that is helpful is some regard because you wont get crisp sounds.                                                                                                                                                                          |
| 10            | The audio examples paired with visual cues                                                                                                                                                                          | More quiz questions. Maybe at the end of each topic                                                                                                                                                                                                                                                                         |
| 11            | Visual information                                                                                                                                                                                                  | Could play the sounds first and then show the ECG (so that way I would not be so reliant on the visual cues and would 'listen harder                                                                                                                                                                                        |
| 12            | The audio's were very helpful! and the animations were very good to follow along with                                                                                                                               | Maybe tips on how to limit artifact noises? Or even audio over to explain the whole ppt? I find listening to someone talk can better my learning                                                                                                                                                                            |

|    |                                                                                                       |                                                                                                                                                                                                           |
|----|-------------------------------------------------------------------------------------------------------|-----------------------------------------------------------------------------------------------------------------------------------------------------------------------------------------------------------|
| 13 | The audio recordings accompanied with a detailed description of what you were listening to            | Maybe if more videos were embedded into the PowerPoint rather than on YouTube                                                                                                                             |
| 14 | The murmur recordings                                                                                 | Even more murmur recordings i.e. from different horses with different grades                                                                                                                              |
| 15 | Listening to the sounds                                                                               | Question and answer                                                                                                                                                                                       |
| 16 | Being able to have information and recordings of the murmurs all in one place                         | I would like it if there were recording of most of the murmurs/arrhythmias embedded in the slides                                                                                                         |
| 17 | Very easy to use, helpful audio                                                                       | Comparing abnormal v normal sounds regularly to note the difference                                                                                                                                       |
| 18 | Revision info to look back on                                                                         | Not much                                                                                                                                                                                                  |
| 19 | The explanations and annotations which accompanied the audio                                          | NIL                                                                                                                                                                                                       |
| 20 | The recorded heart sounds                                                                             | An ecg of the recorded heart sounds so it is easier to follow                                                                                                                                             |
| 21 | Recordings of abnormal sounds                                                                         | The ECG trace moving as the sound is played/animations pointing to each sound on the ECG as it corresponds with the recording. Mainly for when a background noise was heard, otherwise was easy to follow |
| 22 | Recording accompanied by matching ECG                                                                 | Better recordings of tetralogy of fallout, VSD etc. (but understand this could be difficult)                                                                                                              |
| 23 | Good quality recordings. Concise clear explanations                                                   | Having the heart sounds play as a video alongside the sound                                                                                                                                               |
| 24 | The audio was clear and demonstrated sounds at different valves                                       | I can't think of anything                                                                                                                                                                                 |
| 25 | The recordings were great quality. Overall was a great learning resource I will keep for the future   | N/A it was great                                                                                                                                                                                          |
| 26 | The recordings of the heart sounds                                                                    | Different recordings of the same problem, as every case is different and hearing the same problem on different horses would sound different and would help us to learn them better                        |
| 27 | Audio                                                                                                 | Clean up the audio                                                                                                                                                                                        |
| 28 | Audio samples                                                                                         | Visual tracking of soundwave to go with audio                                                                                                                                                             |
| 29 | Realistic sounds with gut sounds in background - useful for in practice to know what these sound like | More audio samples                                                                                                                                                                                        |
| 30 | Clear + realistic heart sounds that went for a good number of cardiac cycles                          | Perhaps have a couple of different horses/ grades for normal and different heart sounds                                                                                                                   |

|      |                                                                                                                                                      |                                                                                                                                                                                                                                                              |
|------|------------------------------------------------------------------------------------------------------------------------------------------------------|--------------------------------------------------------------------------------------------------------------------------------------------------------------------------------------------------------------------------------------------------------------|
| 31   | Audio files really good                                                                                                                              | Perhaps a video of the audio recording one the graph at the same time the recordings are playing                                                                                                                                                             |
| 32   | The sounds and the explanations which allowed me to understand what I am listening to                                                                | I know it is difficult to improve but some of the sounds were very quiet and difficult to hear                                                                                                                                                               |
| 33   | Overlayed waveform transcripts with the audio files was very useful especially for filtering out background noise                                    | Maybe add small explanations of auscultation noises such as ejection clicks, opening snaps etc.                                                                                                                                                              |
| 34   | The sound recordings                                                                                                                                 | Not hearing people speaking in the background of some of the recordings                                                                                                                                                                                      |
| 35   | The clear way it was laid out- I appreciated the clear diagrams. I will definitely be coming back to this before/during my equine rotation in 2022   | Some more information about common clinical presentations with the different heart conditions. This is a great resource!                                                                                                                                     |
| 2022 |                                                                                                                                                      |                                                                                                                                                                                                                                                              |
| 36   | Revision of the anatomy and heart sounds, what each sound corresponded to, as well as seeing the trace and hearing the heart sounds side by side     | More recordings of murmurs rather than the youtube                                                                                                                                                                                                           |
| 37   | The audio                                                                                                                                            | Clear audio, more interactive in the later slides", "thank you! amazing resource                                                                                                                                                                             |
| 38   | Hearing the abnormal heart sounds and the reasoning behind them                                                                                      | Making it more known that it's available                                                                                                                                                                                                                     |
| 39   | Audio and heart/valves image                                                                                                                         | Clearer sounds. Personally the amount of ppt slides put me off a bit because i'm not the biggest fan of sitting down and studying. But the contents are very helpful                                                                                         |
| 40   | Recordings embedded within presentation                                                                                                              | Having the ecg move as the sound plays                                                                                                                                                                                                                       |
| 41   | The recordings plus the ECG                                                                                                                          | More recordings maybe (high quality one)                                                                                                                                                                                                                     |
| 42   | Excellently presented and easy to use - very straightforward and useful in the fact that there is a revision section before going into abnormalities | Just a few typos and mislabels - when listening to mitral valve the picture might be labelling aortic valve or vice versa. Would be good in some text heavy slides if there could be a small heart diagram in the corner just reminding where the valves are |
| 43   | Audio recording of normal and abnormal heart sounds                                                                                                  | ...                                                                                                                                                                                                                                                          |
| 44   | Explanation of the types of murmurs and arrhythmias and what they sound like                                                                         | More audio options and maybe a quiz at the end to test our skills                                                                                                                                                                                            |
| 45   | I really liked the audios - they would have been immensely helpful for my                                                                            | Maybe just more examples? overall it was great.                                                                                                                                                                                                              |

|    |                                                                                                                                     |                                                                                                                                                 |
|----|-------------------------------------------------------------------------------------------------------------------------------------|-------------------------------------------------------------------------------------------------------------------------------------------------|
|    | medicine prac but I didn't know about the resource!                                                                                 |                                                                                                                                                 |
| 46 | Realistic sound with GIT sounds                                                                                                     | Youtube videos embeded into powerpoint                                                                                                          |
| 47 | Detailed presentation, clear audio                                                                                                  | I still feel like actually doing it on live animals help more than watching and listening presentations                                         |
| 48 | I enjoyed listening to the sounds for each individual abnormality and the quiz at the end made me actual realise what I'd picked up | Nothing, it was very useful                                                                                                                     |
| 49 | The murmur sounds                                                                                                                   | N/A                                                                                                                                             |
| 50 | Hearing real life heart sounds rather than perfect simulations                                                                      | Integrating the YouTube videos important to watch, considering they were extra, I did not watch them                                            |
| 51 | Clear and easy to follow                                                                                                            | -                                                                                                                                               |
| 52 | Good description of the different causes of murmurs and arrhythmias.                                                                | Louder audio recordings. Repeat the audio recording automatically once it finishes. Show corresponding position on ECG as the audio is playing. |
| 53 | Having clear heart sounds and good descriptions of the sounds                                                                       | Regulating the sound between videos                                                                                                             |
| 54 | Recordings                                                                                                                          | More recording                                                                                                                                  |
| 55 | Audible aspect                                                                                                                      | Accessibility                                                                                                                                   |
| 56 | Simplified and easy to understand the physiology                                                                                    | One for abdomens and lungs?                                                                                                                     |
| 57 | Having a single document where i can hear different heart sounds                                                                    | The volume differences in audio between recordings and youtube vids                                                                             |
