# Supplementary material for: Assessment of a Teaching Module for Cardiac Auscultation of Horses by Veterinary Students
Source: MDPI journal article supplement (doi:10.3390/ani14091341), 2024-04-29
Supplement: s1 [file s1]

Post-intervention Survey (students): After access to learning resource

I have read the survey information sheet attached and consent to my survey data being used for research

yes ☐

So we can link your responses before and after using the learning resources, can you please enter to following two questions as you did on the first survey

What is the name of your first pet? \_\_\_\_\_

What is the name of the street you grew up on? \_\_\_\_\_

-

- Which of the following captures your age (in years)?
  - Less than 20
  - 21-25
  - 25-30
  - 30-35
  - 35-40
  - 40-50
  - 50-60
  - Above 60
- What is your highest level of education before you commenced BVSc (Hons)?
  - Year 12
  - Certificate IV
  - Bachelor degree (with or without Honours)
  - Master degree
  - Doctoral degree
  - Other (please specify): \_\_\_\_\_
- If you're a student, how many years are you into your veterinary science study?

- 3<sup>rd</sup> year
  - 4<sup>th</sup> year
  - 5<sup>th</sup> year
  - First year out
  - Undertaking residency
  - N/A
- If you're a veterinarian, how many years is it since you've graduated?
- 1-5 years
  - 5-10 years
  - >10 years
  - N/A

Please indicate how strongly you agree or disagree with each of the following statements.

**Note:** Statements refer to common auscultatory findings in horses

|                                                                                                                        | Strongly Agree | Agree | Neutral | Disagree | Strongly disagree |
|------------------------------------------------------------------------------------------------------------------------|----------------|-------|---------|----------|-------------------|
| Q1. This resource helped me prepare for practicals/training                                                            |                |       |         |          |                   |
| Q2. The resource was easy to work with                                                                                 |                |       |         |          |                   |
| Q3. I prefer clear high-quality audio without background noise and artefacts for learning new auscultation techniques, |                |       |         |          |                   |
| Q4. I feel more competent with my practical and diagnostic skills                                                      |                |       |         |          |                   |

|                                                                                       |  |  |  |  |  |
|---------------------------------------------------------------------------------------|--|--|--|--|--|
| Q5. I can differentiate between normal and abnormal equine heart sounds               |  |  |  |  |  |
| Q6. I believe I can diagnose heart sounds with more accuracy after using the resource |  |  |  |  |  |
| Q7. I am familiar with identifying normal heart sounds                                |  |  |  |  |  |
| Q8. I am able to identify mitral valve regurgitation (systolic murmur)                |  |  |  |  |  |
| Q9. I am able to identify aortic valve regurgitation (diastolic murmur)               |  |  |  |  |  |
| Q10. I am able to identify second degree atrioventricular (AV) blocks                 |  |  |  |  |  |
| Q11. I am able to identify atrial fibrillation                                        |  |  |  |  |  |
| Q12. I am able to identify ventricular septal defects                                 |  |  |  |  |  |
| Q13. I am able to identify a patent ductus arteriosus                                 |  |  |  |  |  |
| Q14. I am able to identify pentology or tetralogy of fallot                           |  |  |  |  |  |

Open text:

What was most helpful about the learning resource:

What would improve the learning resource?

If you no longer wish to participate in this survey, simply close the browser window without selecting Submit.

Copy of survey results?

If you would like to be sent a copy of the survey results, please click the link below. This will take you to another webform where you can write your contact details. This will ensure that your survey responses will remain anonymous.

Contact information:

Name: \_\_\_\_\_

UQ student number: \_\_\_\_\_

UQ email address: \_\_\_\_\_

*Thank you very much for your time and feedback!*
