# Supplementary material for: Assessment of a Teaching Module for Cardiac Auscultation of Horses by Veterinary Students
Source: Animals (Basel). 2024 Apr 29;14(9):1341. doi: 10.3390/ani14091341 (PMC11083587; doi:10.3390/ani14091341)
Supplement: Supplementary file 1 [file animals-14-01341-s001.zip]

Archive with 4 entries (4 files):
- File S1. Final Student Version Cardiovascular Recordings.pptx
- File S2. Preintervention Survey (students & veterinarians) Prior to access to learning resource.pdf
- File S3. Postintervention Survey (students) After access to learning resource.pdf
- File S4. Thematic analysis pre- and pos-intervention questions.pdf
